# Supplementary material for: Mitophagy impairment is involved in sevoflurane-induced cognitive dysfunction in aged rats
Source: Aging (Albany NY). 2020 Sep 9;12(17):17235–56. doi: 10.18632/aging.103673 (PMC7521530; doi:10.18632/aging.103673)
Supplement: Supplementary Figure 1 [file aging-12-103673-s002..pdf]

## SUPPLEMENTARY FIGURE

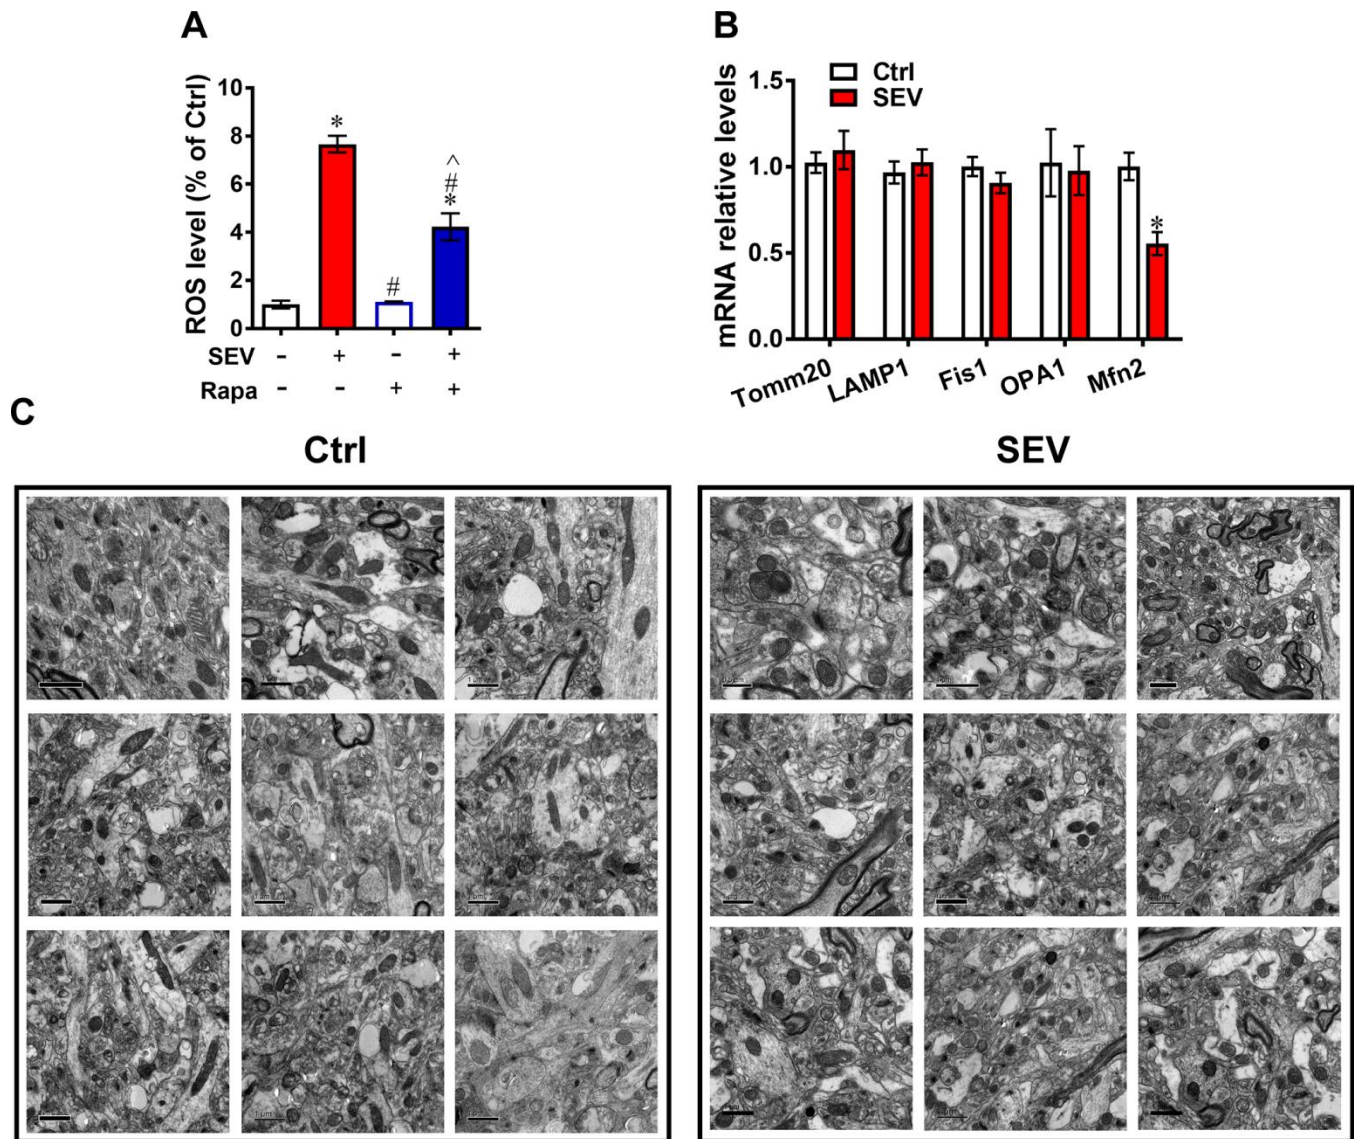

**Supplementary Figure 1. N2A cells were exposed to 0% or 4.1% sevoflurane with/without rapamycin (1  $\mu$ mol/L) for 6 h, and the ROS levels were measured. (A) Eighteen-month-old rats were subjected to 2% sevoflurane for 5 h (SEV). The mRNA levels of Tomm20, LAMP1, Fis1, OPA1 and Mfn2 in the hippocampus were determined by RT-PCR. (B) After perfusion, the ultrastructure of mitochondria in the hippocampus of aged rats was observed under an electron microscope. (C) Images show representative examples from three independent experiments for each group. The data are expressed as mean  $\pm$  SD. \* $P$ <0.05, Ctrl vs SEV; # $P$ <0.05, SEV vs Rapa and SEV+Rapa; ^ $P$ <0.05, Rapa vs SEV+Rapa.**
